# Supplementary material for: Delivery of an immunogenic cell death-inducing copper complex to cancer stem cells using polymeric nanoparticles
Source: RSC Adv. 2022 Feb 11;12(9):5290–9. doi: 10.1039/d1ra08788f (PMC8981415; doi:10.1039/d1ra08788f)
Supplement: RA-012-D1RA08788F-s013 [file RA-012-D1RA08788F-s013.pdf]

## Supporting Information for

# Delivery of an Immunogenic Cell Death-Inducing Copper Complex to Cancer Stem Cells Using Polymeric Nanoparticles

Ginevra Passeri<sup>1</sup>, Joshua Northcote-Smith<sup>1</sup>, and Kogularamanan Suntharalingam<sup>1,\*</sup>

<sup>1</sup> School of Chemistry, University of Leicester, Leicester, LE1 7RH, United Kingdom

Email: k.suntharalingam@leicester.ac.uk

### Table of Content

|                 |                                                                                                                                                                                                                                            |
|-----------------|--------------------------------------------------------------------------------------------------------------------------------------------------------------------------------------------------------------------------------------------|
| <b>Fig. S1</b>  | UV-Vis spectrum of <b>1</b> (25 $\mu$ M) in DMSO over the course of 24 h at 37 $^{\circ}$ C.                                                                                                                                               |
| <b>Fig. S2</b>  | UV-Vis spectrum of <b>1</b> (25 $\mu$ M) in DMF over the course of 24 h at 37 $^{\circ}$ C.                                                                                                                                                |
| <b>Fig. S3</b>  | UV-Vis spectrum of <b>1</b> (25 $\mu$ M) in PBS:DMSO (200:1) with 10% FBS over the course of 24 h at 37 $^{\circ}$ C.                                                                                                                      |
| <b>Fig. S4</b>  | UV-Vis spectrum of <b>1</b> (25 $\mu$ M) in PBS:DMSO (200:1) in the presence of ascorbic acid (250 $\mu$ M) over the course of 24 h at 37 $^{\circ}$ C.                                                                                    |
| <b>Fig. S5</b>  | UV-Vis spectrum of <b>1</b> (25 $\mu$ M) in PBS:DMSO (200:1) in the presence of glutathione (250 $\mu$ M) over the course of 24 h at 37 $^{\circ}$ C.                                                                                      |
| <b>Fig. S6</b>  | UV-Vis spectrum of <b>1</b> (50 $\mu$ M) in the presence of ascorbic acid (500 $\mu$ M) and bathocuproine disulfonate, BCS (100 $\mu$ M) in PBS:DMSO (200:1) over the course of 24 h at 37 $^{\circ}$ C.                                   |
| <b>Fig. S7</b>  | UV-Vis spectrum of <b>1</b> (50 $\mu$ M) in the presence of glutathione (500 $\mu$ M) and bathocuproine disulfonate, BCS (100 $\mu$ M) in PBS:DMSO (200:1) over the course of 24 h at 37 $^{\circ}$ C.                                     |
| <b>Fig. S8</b>  | ESI mass spectra (positive mode) of <b>1</b> (500 $\mu$ M) in H <sub>2</sub> O:DMSO (10:1) (A), and in the presence of ascorbic acid (5 mM) (B) or in the presence of glutathione (5 mM) (C) after incubation for 24 h at 37 $^{\circ}$ C. |
| <b>Fig. S9</b>  | Dynamic light scattering size distribution of <b>1</b> NP <sup>10</sup> suspended in water. Size refers to diameter of nanoparticles in nm.                                                                                                |
| <b>Fig. S10</b> | Dynamic light scattering size distribution of empty PEG-PLGA nanoparticles suspended in water. Size refers to diameter of nanoparticles in nm.                                                                                             |

- Fig. S11** Variation in **1 NP<sup>10</sup>** diameter upon incubation in water, PBS with 10% FBS, and mammary epithelial growth medium (MEGM) over the course of 72 h at 37 °C.
- Fig. S12** Copper content in HMLER and HMLER-shEcad cells treated with **1 NP<sup>10</sup>** (110 nM for 24 h) or **1** (110 nM for 24 h) at 37 °C.
- Fig. S13** Copper content in HMLER and HMLER-shEcad cells treated with **1 NP<sup>10</sup>** (110 nM for 4 h) at 4 °C or 37 °C.
- Fig. S14** Copper content in HMLER-shEcad cells treated with **1 NP<sup>10</sup>** only (16 nM for 24 h), and upon pre-incubation with ammonium chloride (50 mM for 2 h) or chloroquine (100 µM for 2 h) at 37 °C. Error bars represent standard deviations and Student *t test*, \* = *p* < 0.05.
- Fig. S15** The amount of copper released from **1 NP<sup>10</sup>** upon incubation in PBS (pH 7.4) or sodium acetate buffer (pH 5.2) over the course of 72 h at 37 °C.
- Fig. S16** Representative dose-response curves for the treatment of HMLER and HMLER-shEcad cells with **1 NP<sup>10</sup>**.
- Fig. S17** Representative dose-response curves for the treatment of HMLER and HMLER-shEcad cells with empty PEG–PLGA nanoparticles.
- Fig. S18** Representative bright-field images (× 10) of HMLER-shEcad mammospheres in the absence and presence of salinomycin at its respective IC<sub>20</sub> values for 5 days.
- Fig. S19** Representative dose-response curve for the treatment of HMLER-shEcad mammospheres with **1 NP<sup>10</sup>**.
- Fig. S20** Representative dose-response curve for the treatment of HMLER-shEcad mammospheres with empty PEG–PLGA nanoparticles.
- Fig. S21** Representative dose-response curves for the treatment of HMLER-shEcad cells with **1 NP<sup>10</sup>** after 72 h incubation in the presence of salubrinal (10 µM).
- Fig. S22** Immunoblotting analysis of proteins related to the unfolded protein response (UPR). Protein expression in HMLER-shEcad cells following treatment with **1 NP<sup>10</sup>** (40–191 nM) for (A) 4 h or (B) 24 h.
- Fig. S23** Immunoblotting analysis of proteins related to apoptosis. Protein expression in HMLER-shEcad cells following treatment with **1 NP<sup>10</sup>** (37–146 nM for 72 h).
- Fig. S24** Representative dose-response curves for the treatment of HMLER-shEcad cells with **1 NP<sup>10</sup>** after 72 h incubation in the presence of z-VAD-FMK (5 µM).
- Fig. S25** Representative histograms displaying the green fluorescence emitted by anti-CRT Alexa Fluor 488 nm antibody-stained HMLER-shEcad cells untreated (red), and treated with **1** (0.2 µM for 24 h) (blue).
- Fig. S26** Representative histograms displaying the green fluorescence emitted by anti-CRT Alexa Fluor 488 nm antibody-stained HMLER-shEcad cells untreated (red), and treated with cisplatin (150 µM for 24 h) and thapsigargin (7 µM for 24 h) (blue).
- Fig. S27** Immunoblotting analysis of high mobility group box 1 (HMGB-1). Protein expression in HMLER-shEcad cells following treatment with **1 NP<sup>10</sup>** (95–764 nM for 24 h).

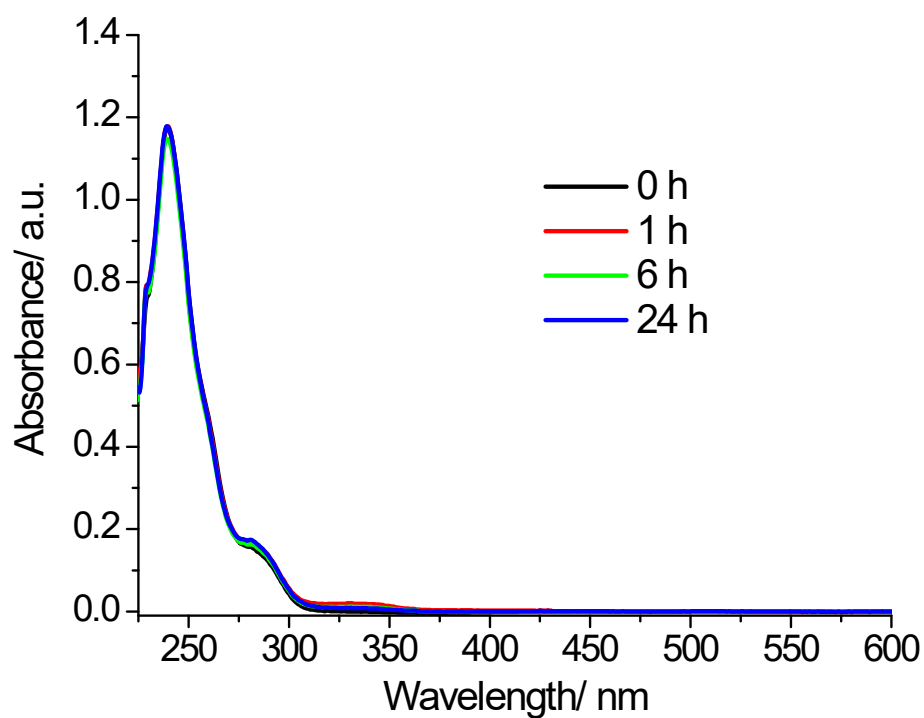

**Fig. S1** UV-Vis spectrum of **1** (25 μM) in DMSO over the course of 24 h at 37 °C.

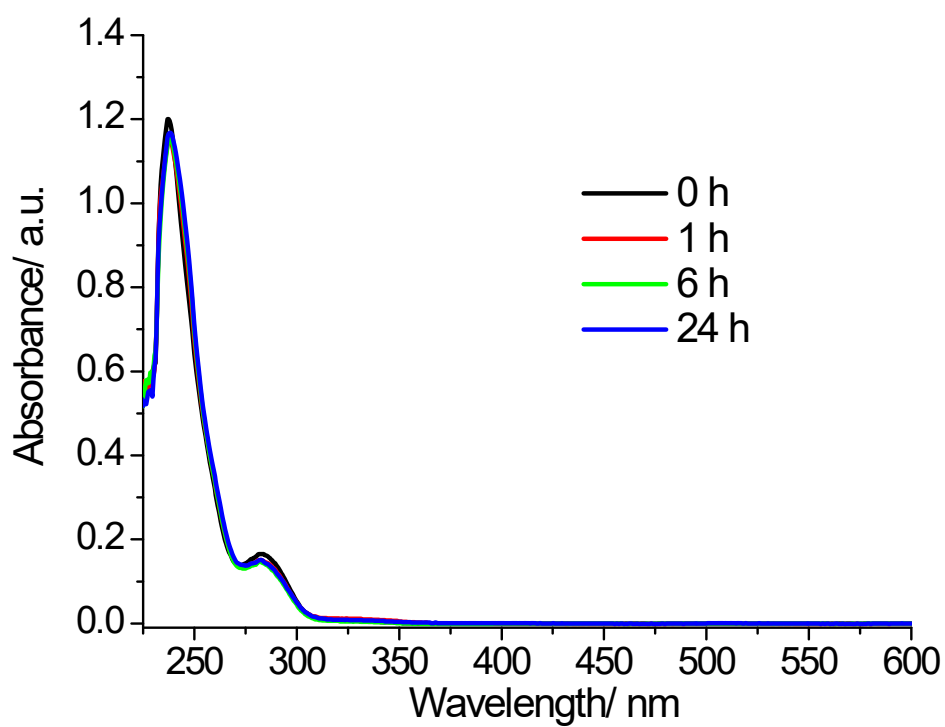

**Fig. S2** UV-Vis spectrum of **1** (25 μM) in DMF over the course of 24 h at 37 °C.

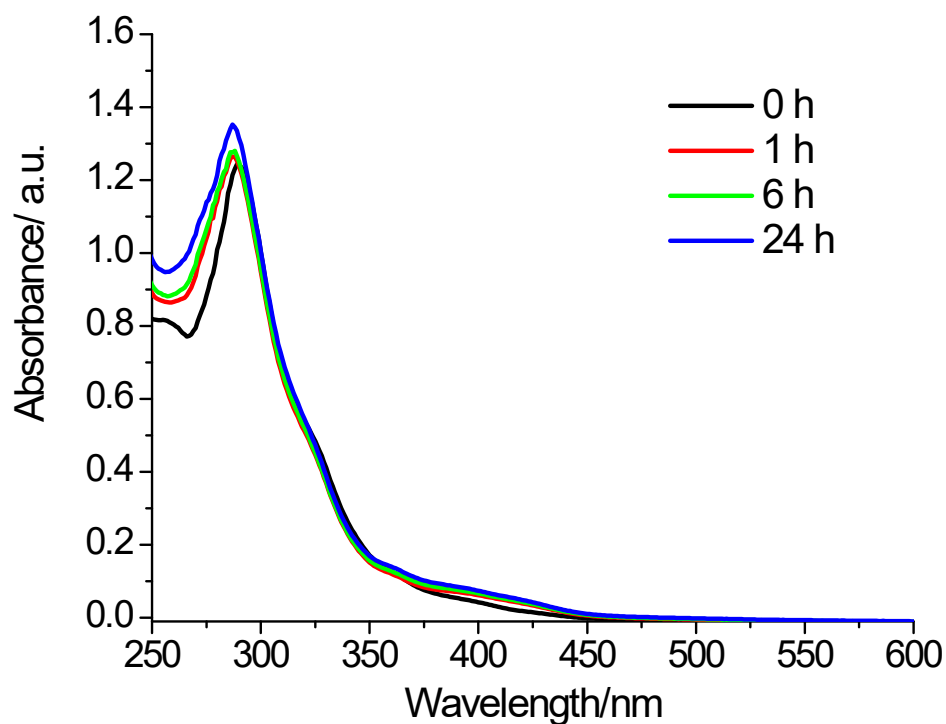

**Fig. S3** UV-Vis spectrum of **1** (25 μM) in PBS:DMSO (200:1) with 10% FBS over the course of 24 h at 37 °C.

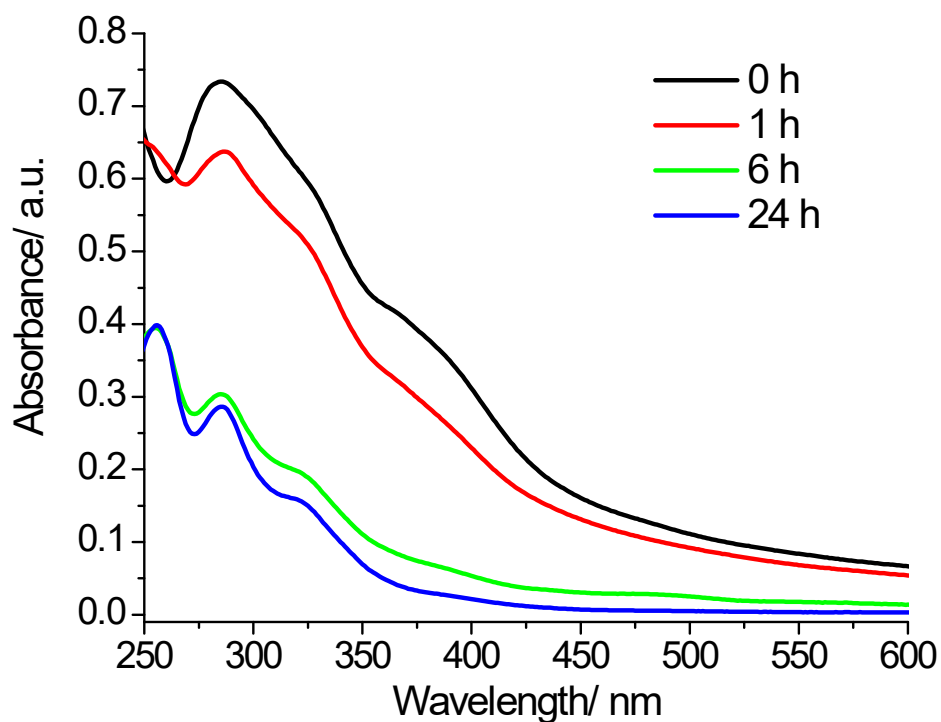

**Fig. S4** UV-Vis spectrum of **1** (25 μM) in PBS:DMSO (200:1) in the presence of ascorbic acid (250 μM) over the course of 24 h at 37 °C.

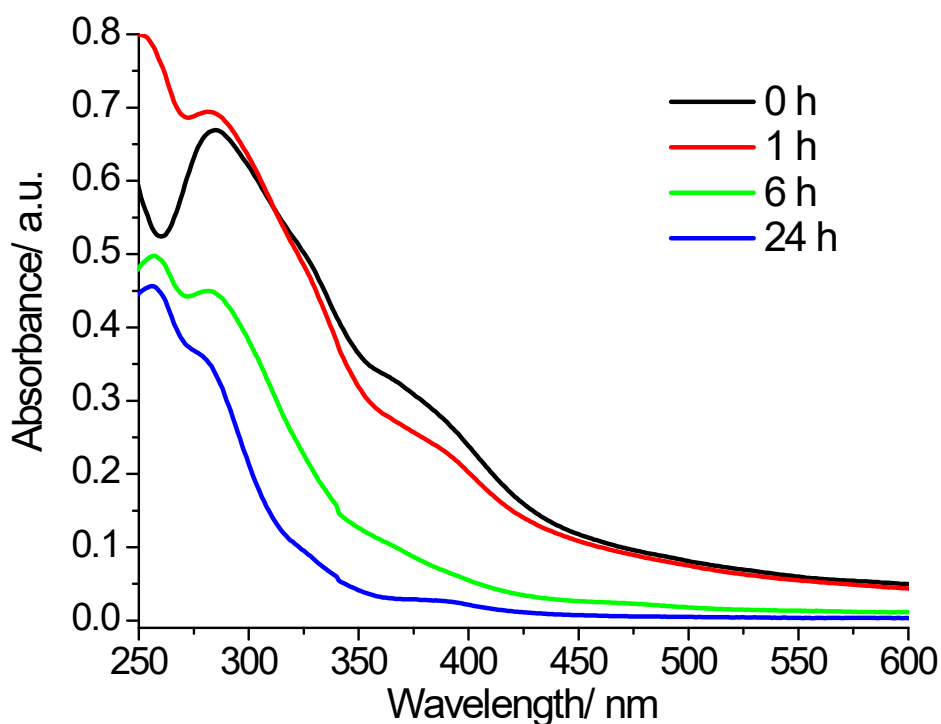

**Fig. S5** UV-Vis spectrum of **1** (25  $\mu\text{M}$ ) in PBS:DMSO (200:1) in the presence of glutathione (250  $\mu\text{M}$ ) over the course of 24 h at 37  $^{\circ}\text{C}$ .

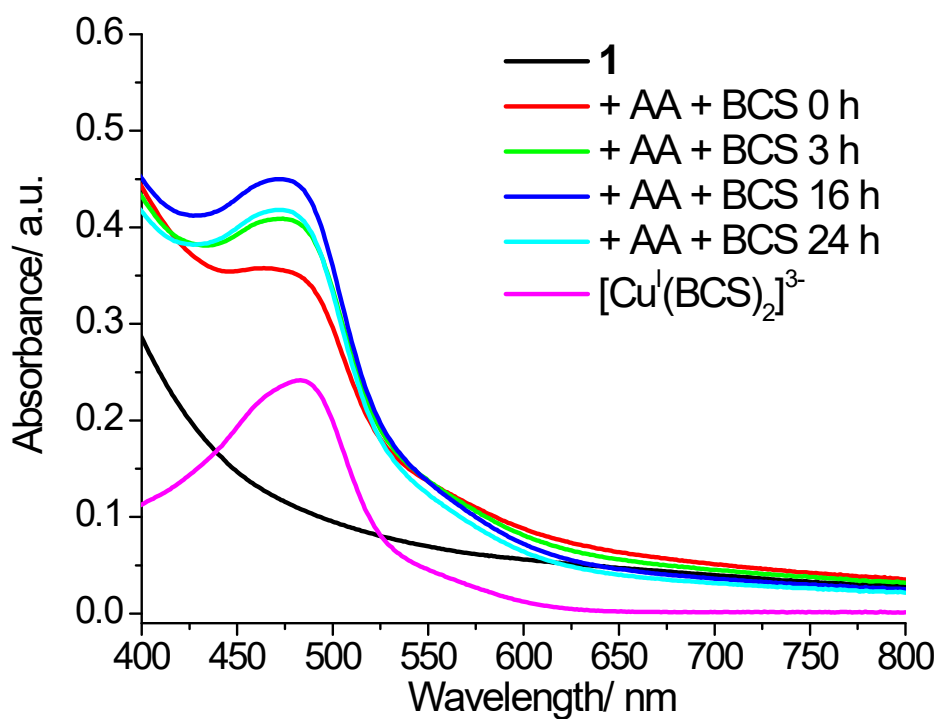

**Fig. S6** UV-Vis spectrum of **1** (50  $\mu\text{M}$ ) in the presence of ascorbic acid (500  $\mu\text{M}$ ) and bathocuproine disulfonate, BCS (100  $\mu\text{M}$ ) in PBS:DMSO (200:1) over the course of 24 h at 37  $^{\circ}\text{C}$ .

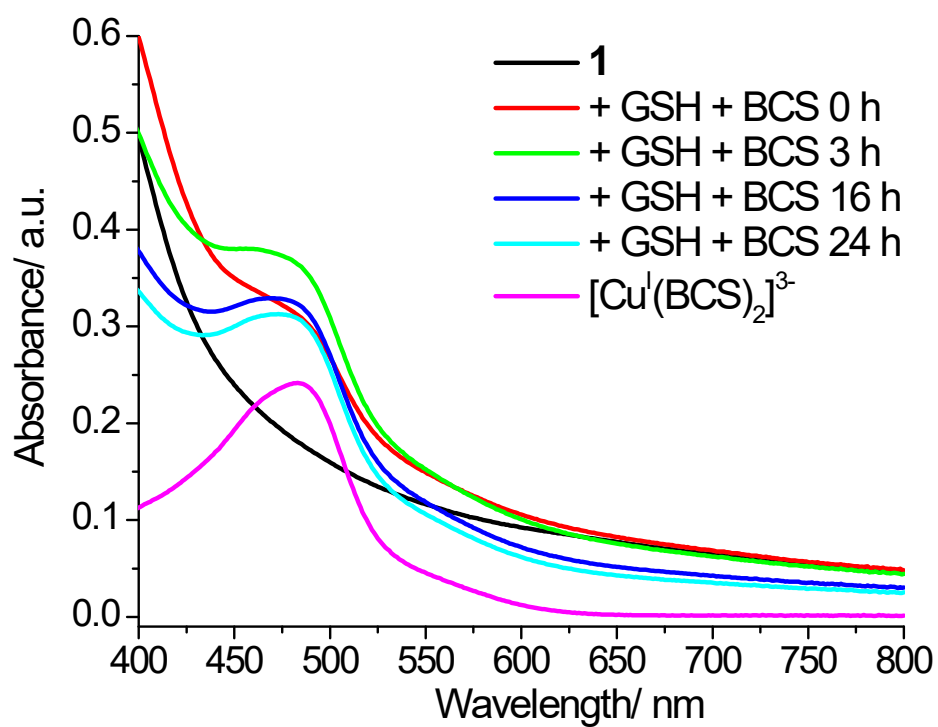

**Fig. S7** UV-Vis spectrum of **1** (50  $\mu\text{M}$ ) in the presence of glutathione (500  $\mu\text{M}$ ) and bathocuproine disulfonate, BCS (100  $\mu\text{M}$ ) in PBS:DMSO (200:1) over the course of 24 h at 37  $^{\circ}\text{C}$ .

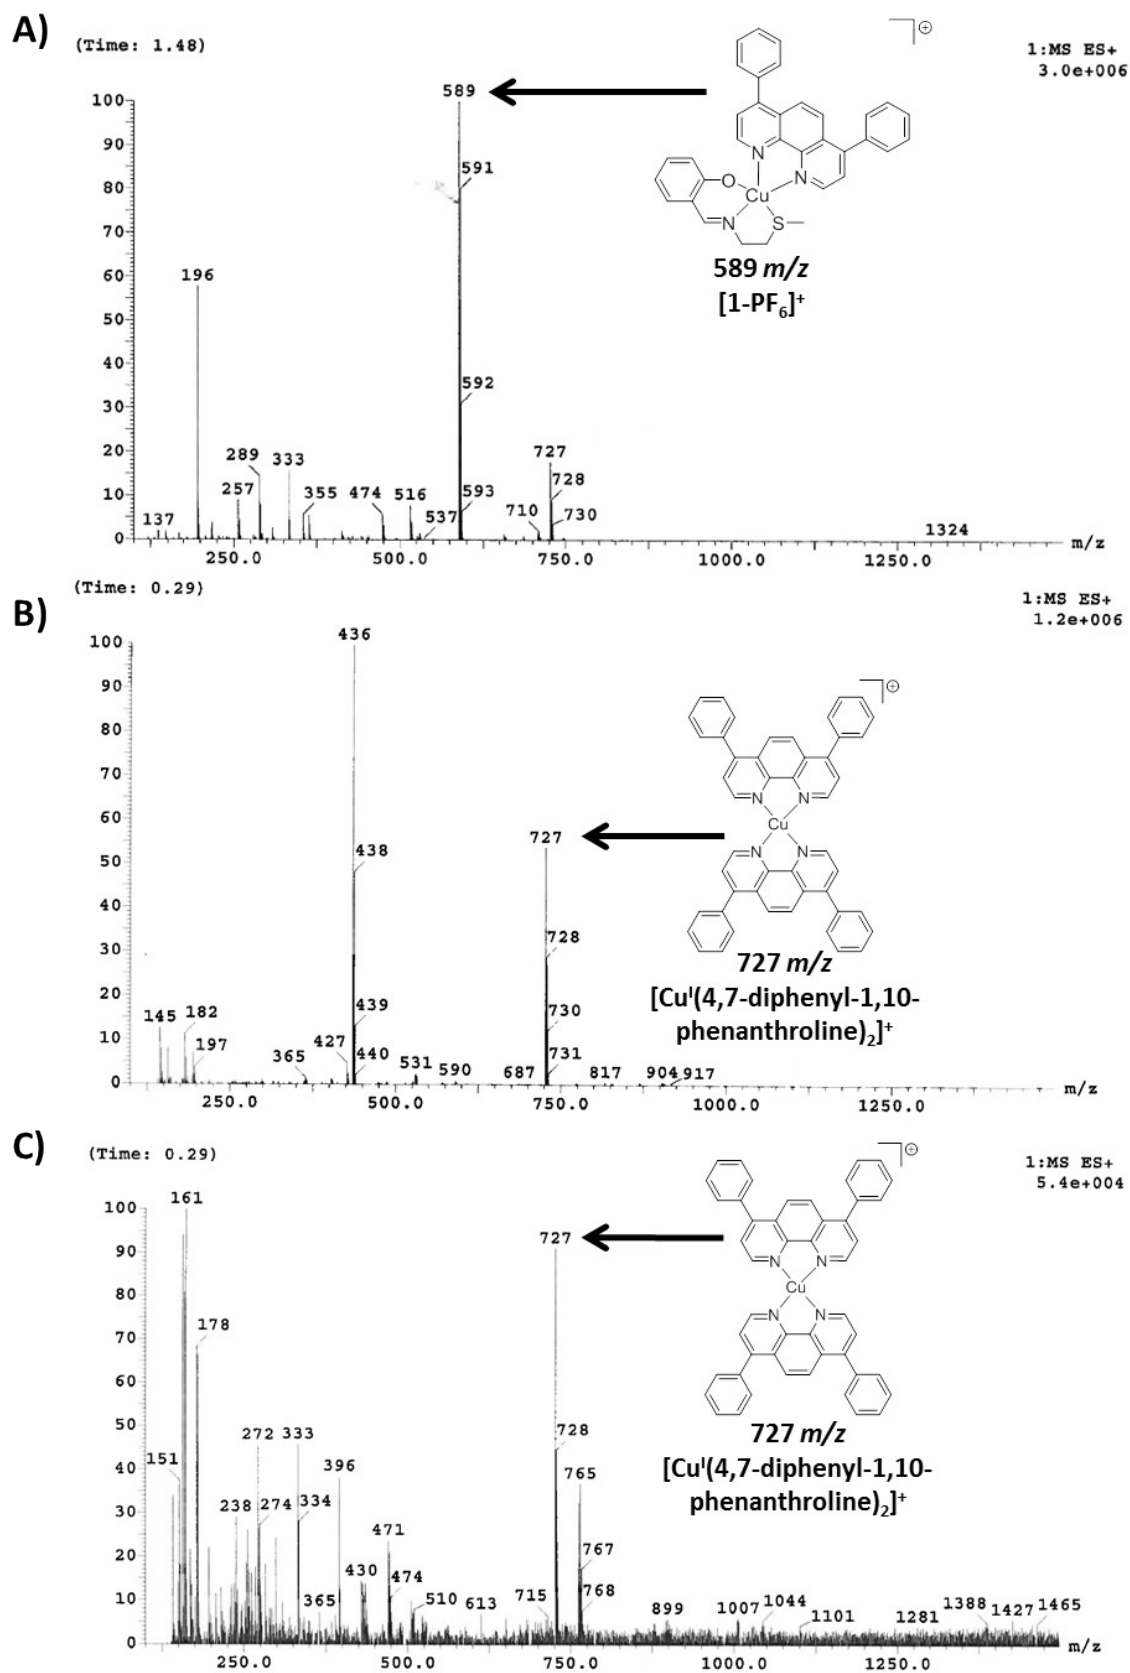

**Fig. S8** ESI mass spectra (positive mode) of **1** (500  $\mu$ M) in  $\text{H}_2\text{O}:\text{DMSO}$  (10:1) (A), and in the presence of ascorbic acid (5 mM) (B) or in the presence of glutathione (5 mM) (C) after incubation for 24 h at 37  $^\circ\text{C}$ .

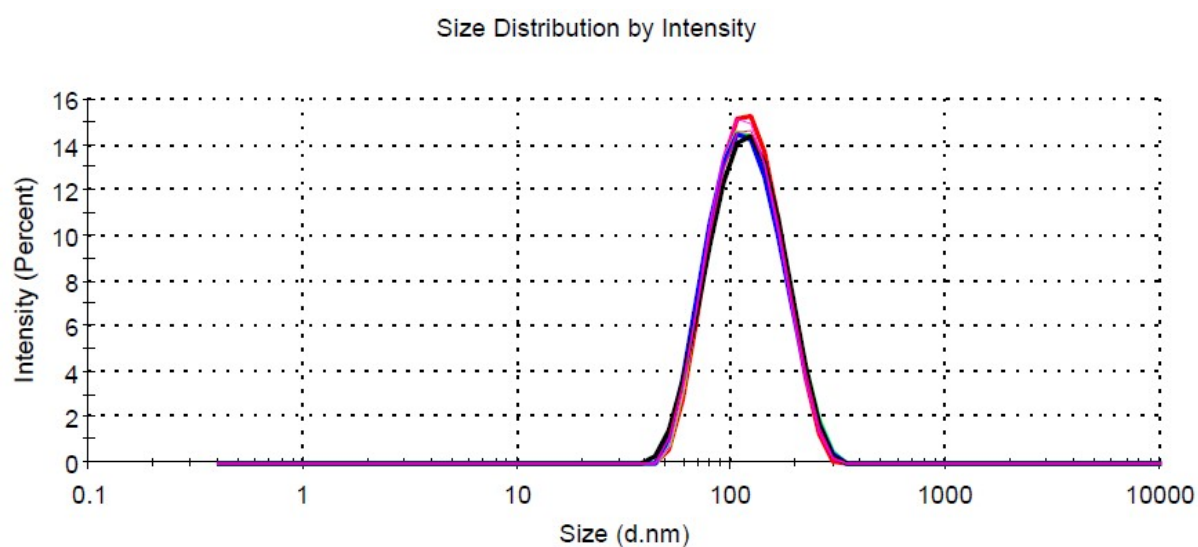

**Fig. S9** Dynamic light scattering size distribution of 1 NP<sup>10</sup> suspended in water. Size refers to diameter of nanoparticles in nm.

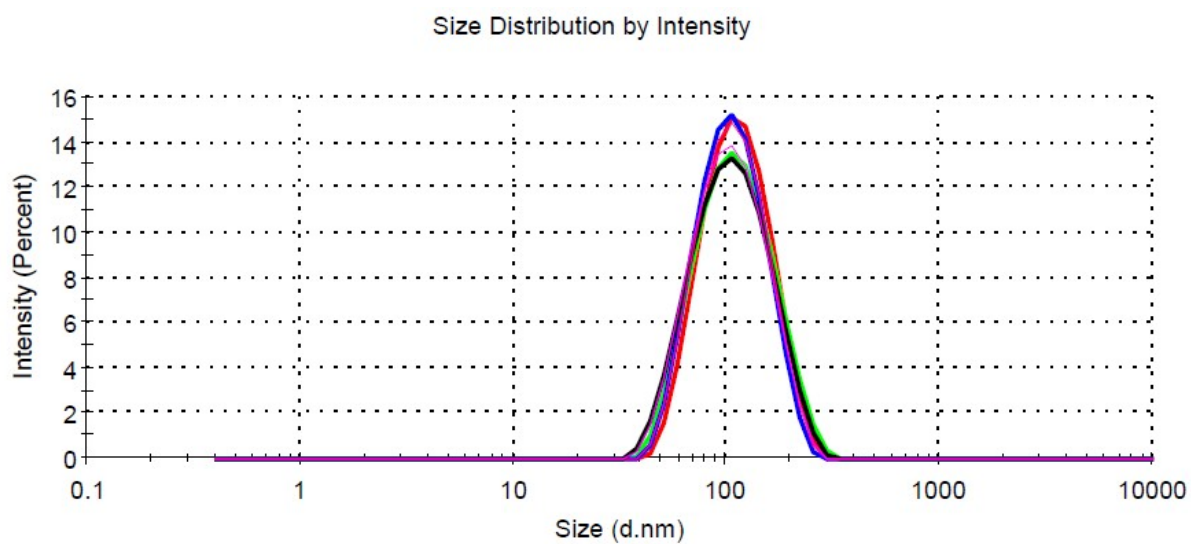

**Fig. S10** Dynamic light scattering size distribution of empty PEG-PLGA nanoparticles suspended in water. Size refers to diameter of nanoparticles in nm.

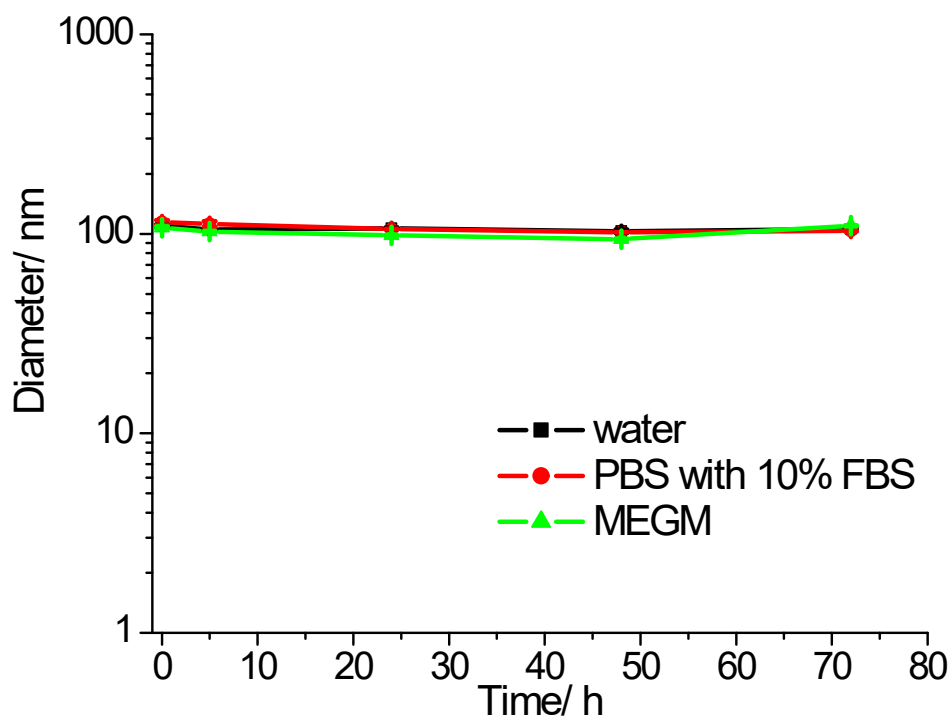

**Fig. S11** Variation in **1** NP<sup>10</sup> diameter upon incubation in water, PBS with 10% FBS, and mammary epithelial growth medium (MEGM) over the course of 72 h at 37 °C.

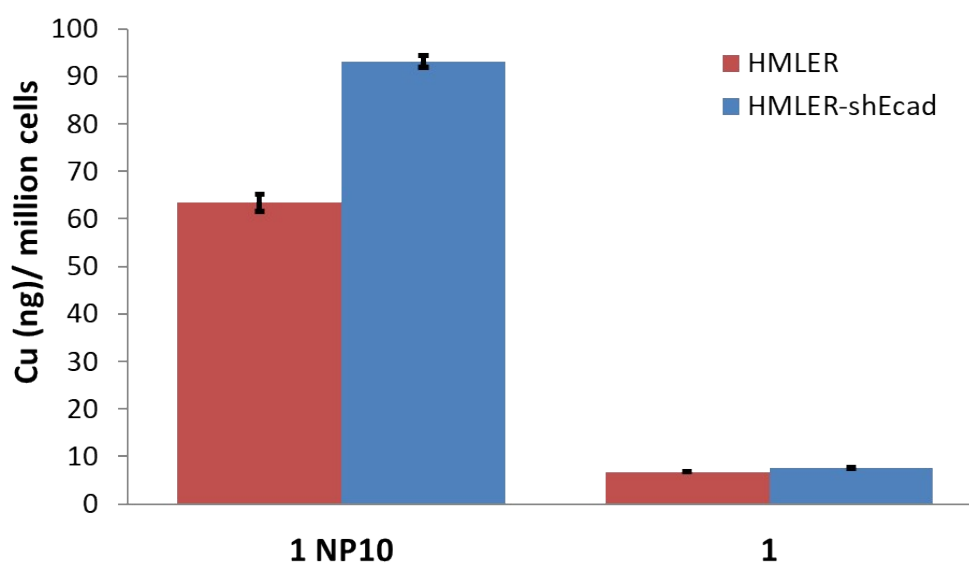

**Fig. S12** Copper content in HMLER and HMLER-shEcad cells treated with **1** NP<sup>10</sup> (110 nM for 24 h) or **1** (110 nM for 24 h) at 37 °C.

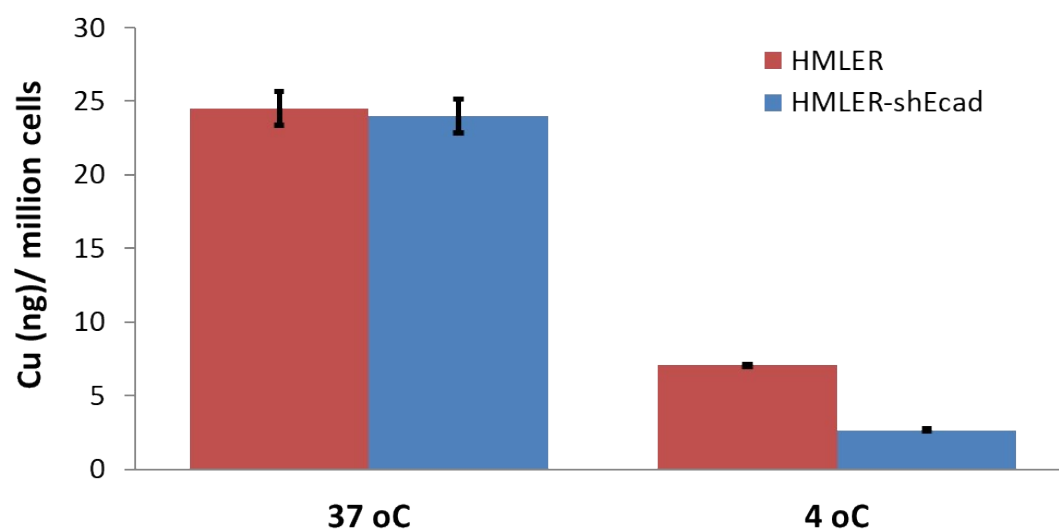

**Fig. S13** Copper content in HMLER and HMLER-shEcad cells treated with **1 NP<sup>10</sup>** (110 nM for 4 h) at 4 °C or 37 °C.

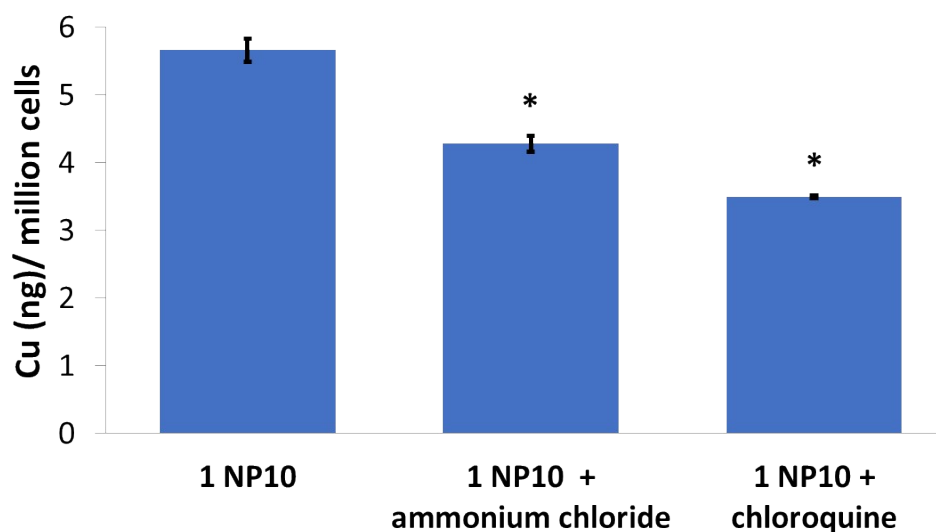

**Fig. S14** Copper content in HMLER-shEcad cells treated with **1 NP<sup>10</sup>** only (16 nM for 24 h), and upon pre-incubation with ammonium chloride (50 mM for 2 h) or chloroquine (100 μM for 2 h) at 37 °C. Error bars represent standard deviations and Student *t test*, \* =  $p < 0.05$ .

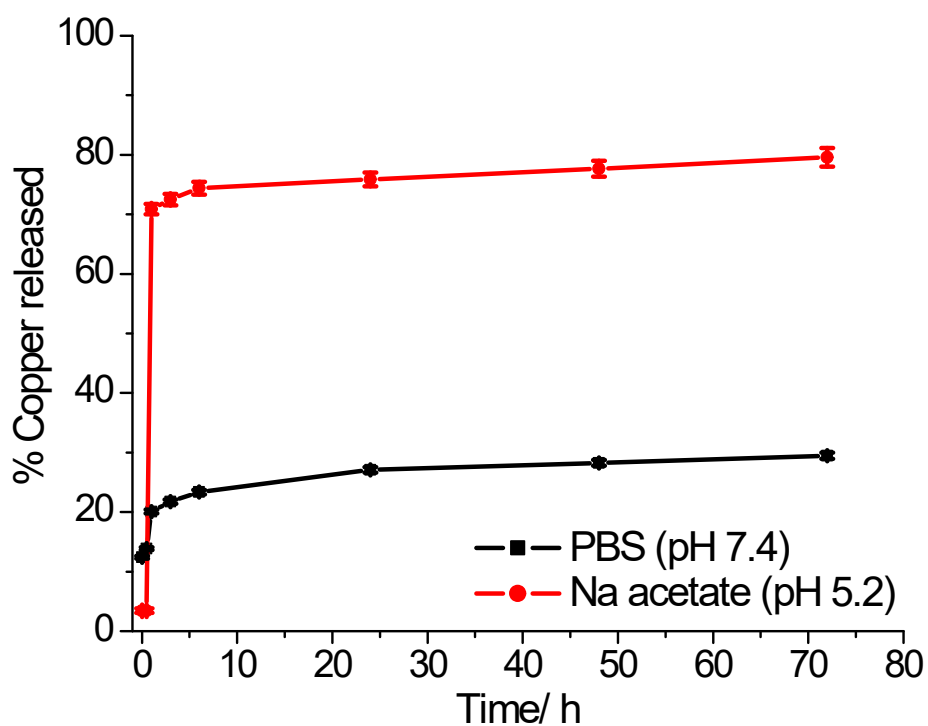

**Fig. S15** The amount of copper released from **1 NP<sup>10</sup>** upon incubation in PBS (pH 7.4) or sodium acetate buffer (pH 5.2) over the course of 72 h at 37 °C.

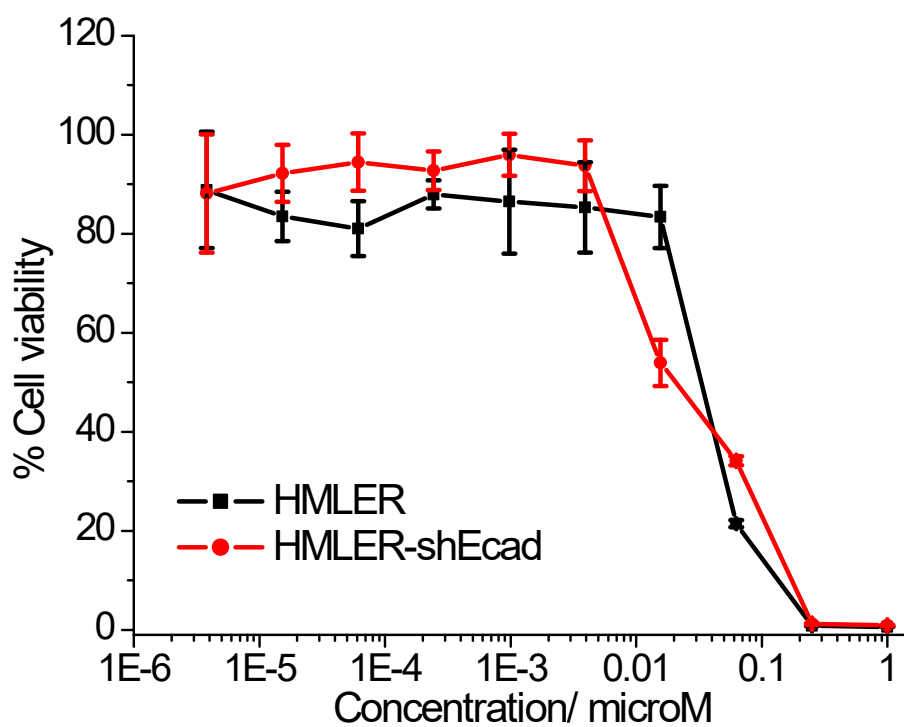

**Fig. S16** Representative dose-response curves for the treatment of HMLER and HMLER-shEcad cells with **1 NP<sup>10</sup>**.

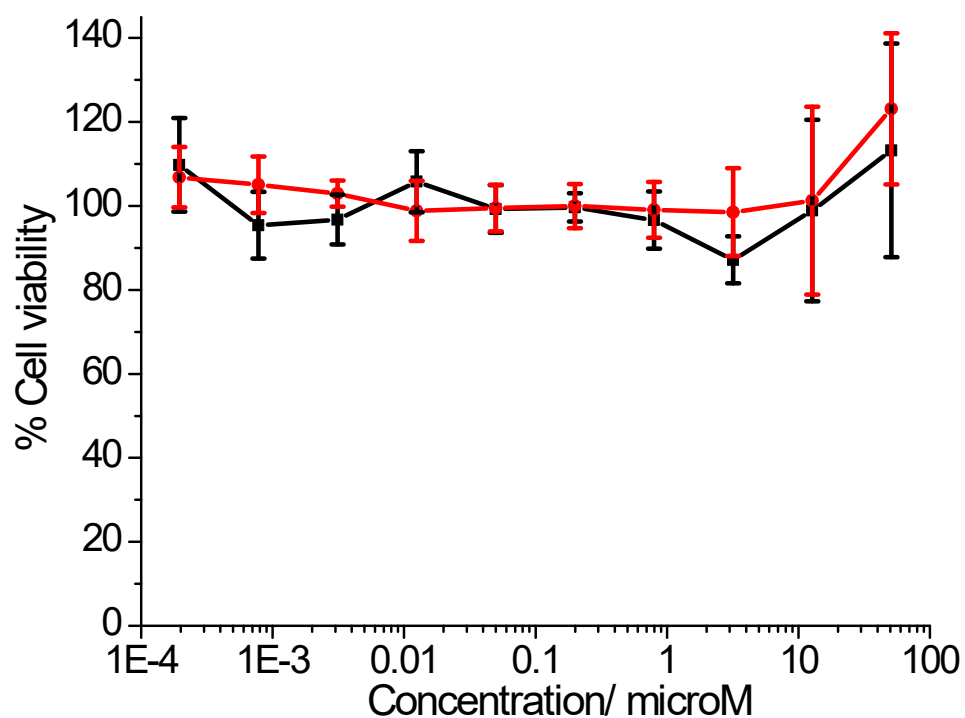

**Fig. S17** Representative dose-response curves for the treatment of HMLER and HMLER-shEcad cells with empty PEG-PLGA nanoparticles.

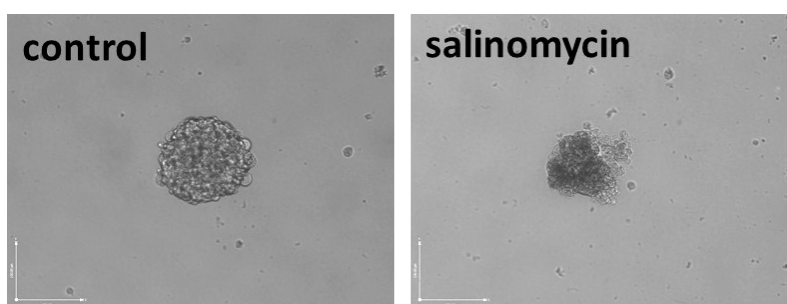

**Fig. S18** Representative bright-field images ( $\times 10$ ) of HMLER-shEcad mammospheres in the absence and presence of salinomycin at its respective  $IC_{20}$  values for 5 days.

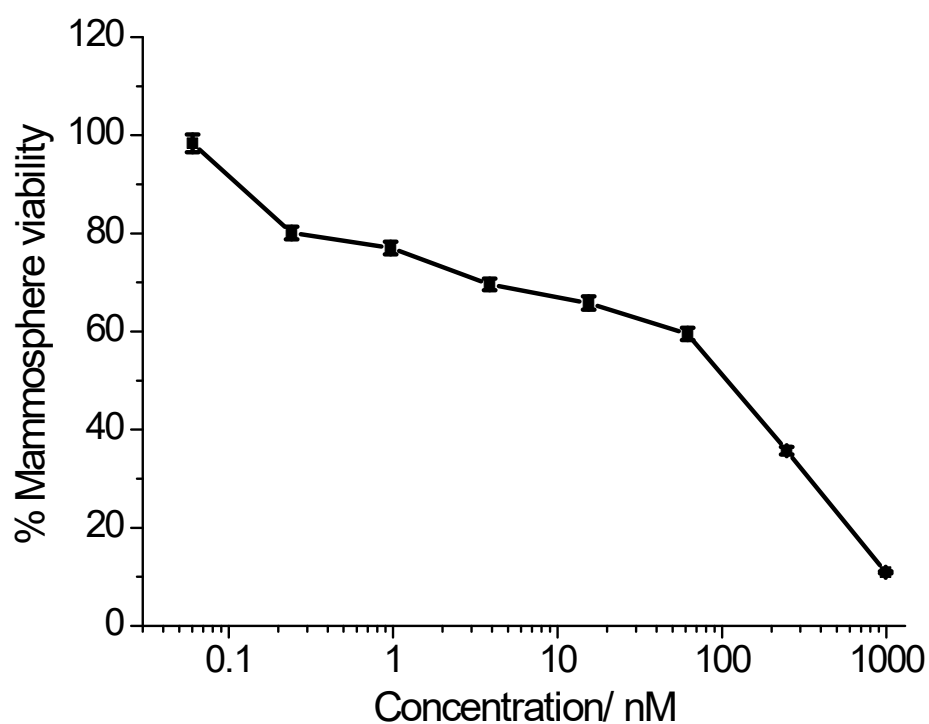

**Fig. S19** Representative dose-response curve for the treatment of HMLER-shEcad mammospheres with **1 NP<sup>10</sup>**.

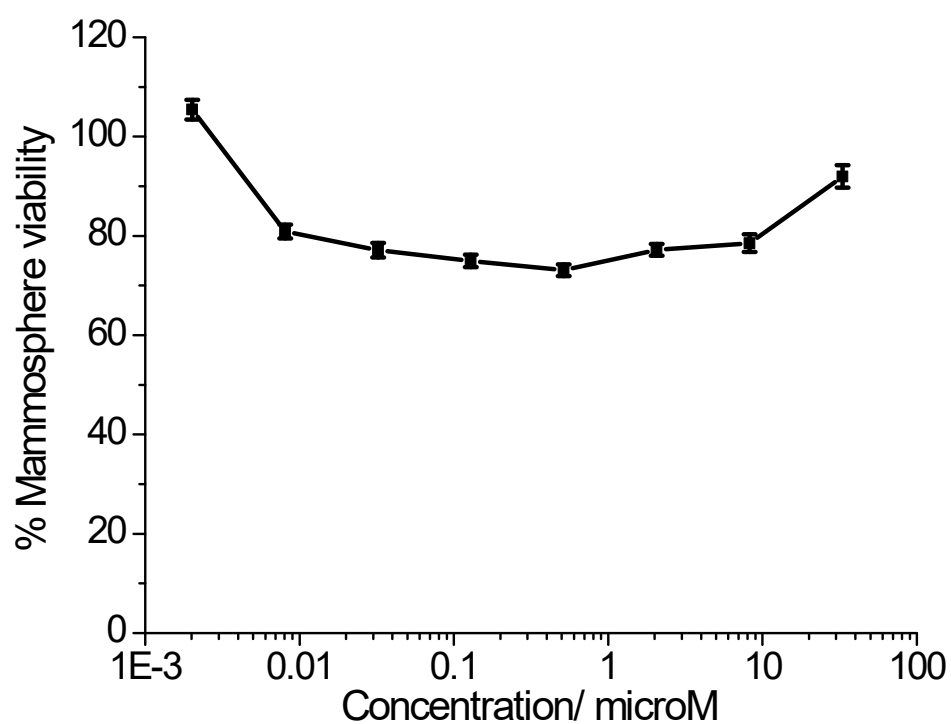

**Fig. S20** Representative dose-response curve for the treatment of HMLER-shEcad mammospheres with empty PEG-PLGA nanoparticles.

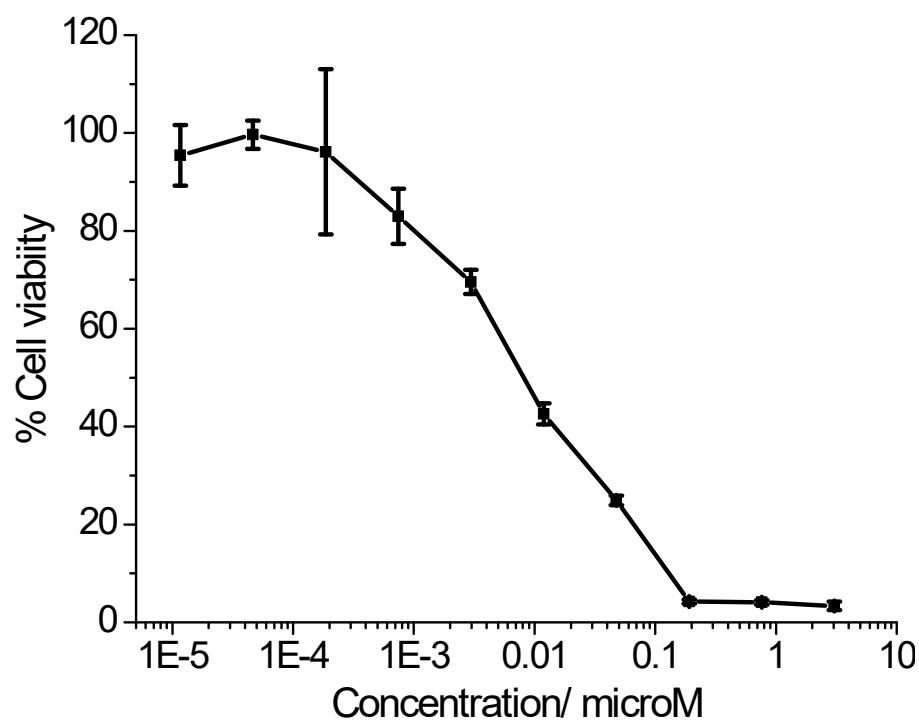

**Fig. S21** Representative dose-response curves for the treatment of HMLER-shEcad cells with **1 NP<sup>10</sup>** after 72 h incubation in the presence of salubrinal (10  $\mu$ M).

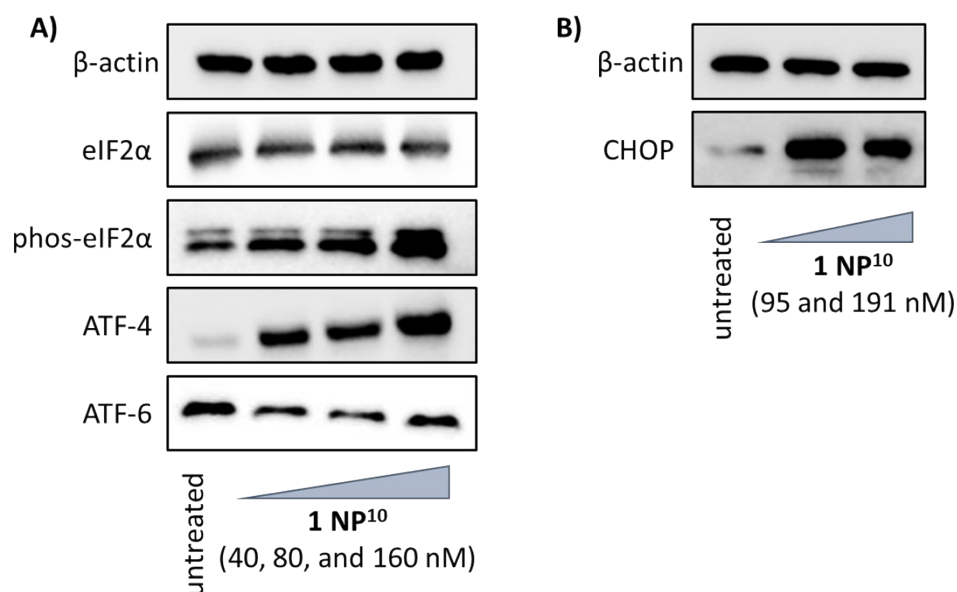

**Fig. S22** Immunoblotting analysis of proteins related to the unfolded protein response (UPR). Protein expression in HMLER-shEcad cells following treatment with **1 NP<sup>10</sup>** (40–191 nM) for (A) 4 h or (B) 24 h.

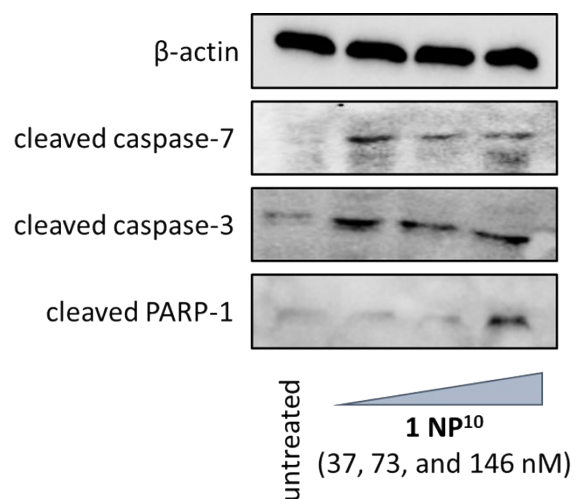

**Fig. S23** Immunoblotting analysis of proteins related to apoptosis. Protein expression in HMLER-shEcad cells following treatment with **1 NP<sup>10</sup>** (37–146 nM for 72 h).

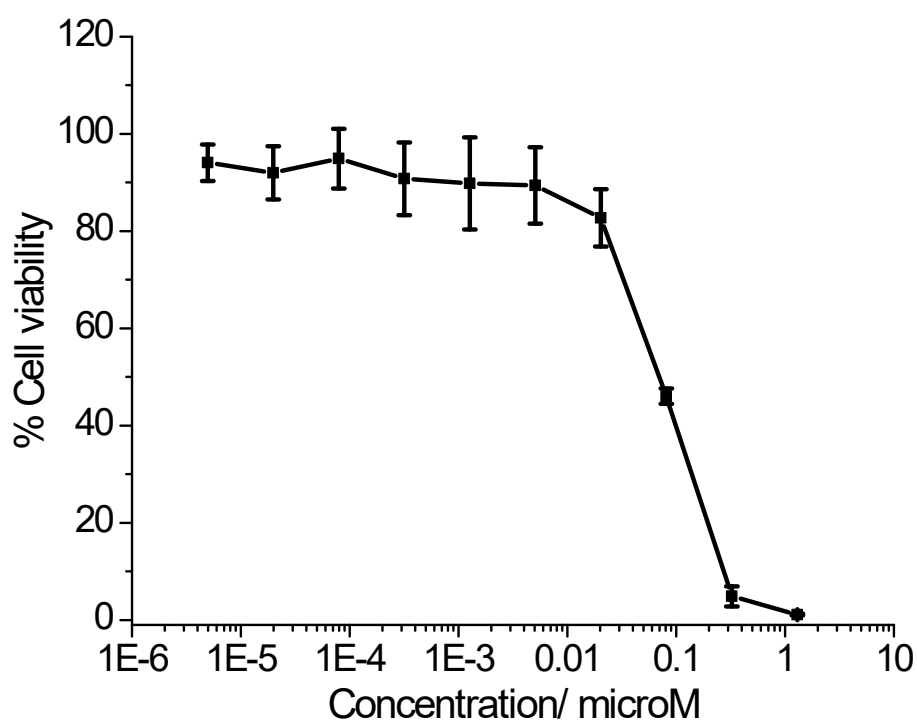

**Fig. S24** Representative dose-response curves for the treatment of HMLER-shEcad cells with **1 NP<sup>10</sup>** after 72 h incubation in the presence of z-VAD-FMK (5  $\mu$ M).

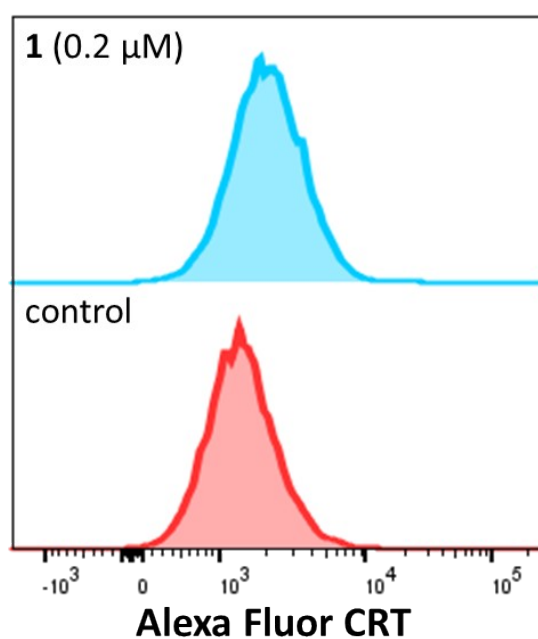

**Fig. S25** Representative histograms displaying the green fluorescence emitted by anti-CRT Alexa Fluor 488 nm antibody-stained HMLER-shEcad cells untreated (red), and treated with **1** (0.2  $\mu$ M for 24 h) (blue).

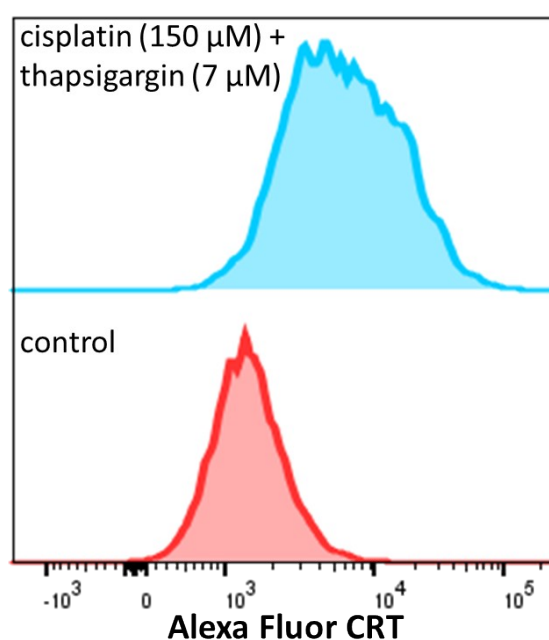

**Fig. S26** Representative histograms displaying the green fluorescence emitted by anti-CRT Alexa Fluor 488 nm antibody-stained HMLER-shEcad cells untreated (red), and treated with cisplatin (150  $\mu$ M for 24 h) and thapsigargin (7  $\mu$ M for 24 h) (blue).

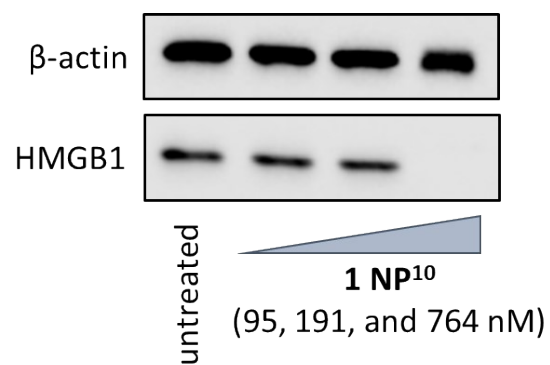

**Fig. S27** Immunoblotting analysis of high mobility group box 1 (HMGB-1). Protein expression in HMLER-shEcad cells following treatment with **1 NP<sup>10</sup>** (95–764 nM for 24 h).
